# Supplementary material for: The role of protein hydrophobicity in thionin–phospholipid interactions: a comparison of α1 and α2-purothionin adsorbed anionic phospholipid monolayers
Source: Royal Society of Chemistry journal article supplement (doi:10.1039/c2cp42029e), 2012-01-01
Supplement: c2cp42029e.pdf [file c2cp42029e.pdf]

## Supplementary Material

### A Comparison of the surface pressure vs. area isotherms of tail hydrogenated and tail deuterated 1,2-dipalmitoyl-*sn*-glycero-3-phospho-(1'-*rac*-glycerol).

**Materials:** Fully hydrogenated and tail deuterated ( $d_{62}$ -) 1,2-dipalmitoyl-*sn*-glycero-3-phospho-(1'-*rac*-glycerol), DPPG; (synthetic, purity >99%) were purchased from Avanti Polar Lipids (Alabaster, AL, USA) and used without further purification. Stock solutions (1 g/L) of DPPG were prepared in HPLC grade chloroform (Sigma-Aldrich, Dorset, UK) and stored at room temperature. Phosphate buffer salts were also obtained from Sigma-Aldrich (Dorset, UK).

**Surface Pressure vs. Area Measurements:** Surface pressure measurements were performed on a Langmuir trough (Model 601, Nima Technology Ltd, Coventry, UK). To create lipid monolayers at the air/water interface, the trough was filled with 0.02 M phosphate buffer (pH 7) and 50  $\mu$ l of fully hydrogenated or tail deuterated ( $d_{62}$ -) DPPG solution (1 g/l) was spread at the air/water interface. After chloroform evaporation surface pressure vs. area ( $\pi$ -A) measurements were conducted. All measurements were conducted at 20°C.

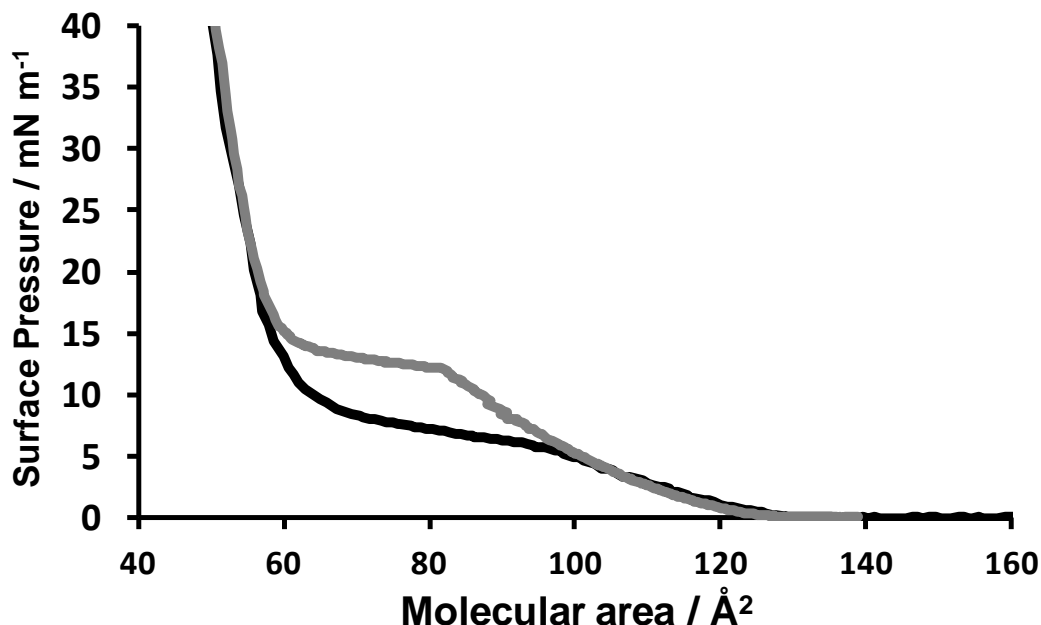

**Figure S1, The surface pressure vs. molecular area ( $\pi$ -A) isotherms of tail hydrogenated (black line) and a tail deuterated ( $d_{62}$ , grey line) 1,2-dipalmitoyl-*sn*-glycero-3-phospho-(1'-*rac*-glycerol) monolayers on a 20 mM pH 7.0 phosphate buffer subphase.**

Figure S1 shows a comparison of the surface pressure vs. area isotherms obtained from fully hydrogenated and tail deuterated (D62) DPPG monolayer used in the experiments described.

The compression isotherms of fully hydrogenated and chain deuterated ( $d_{62}$ -) DPPG differ in respect to the position of the liquid expanded to liquid condense phase transition. The reason for the difference in the LE-LC phase transition discussed in more detail elsewhere<sup>1</sup>. Briefly, this effect is thought to be related to a reduction of the interlocking of hydrocarbon chains in deuterated lipid tails compared to hydrogenated chains, due to the difference in bond C-D bond length from that of C-H<sup>2,3</sup>.

Other regions of the ( $\pi$ -A) isotherms of the d and h-DPPG monolayer overlay each other well (see Fig. S1). In particular at the initial surface pressure used for protein interaction studies (22 mN m<sup>-1</sup>) of the tail deuterated and tail hydrogenated is in the condense phase for both h and d-DPPG.

## References

1. Dabkowska, A., Barlow, D. J., Hughes, A. V., Campbell, R. A., Quinn, P. J., and Lawrence, M. J., *J. R. Soc. Interface*, 2011, 9, 548–561.
2. Petersen, N. O., Kroon, P. A., Kainoshoa, M., and Chan, S. I., *Chem. Phys. Lipids*, 1975 14, 343–349.
3. Sunder, S., Cameron, D., Mantsch, H. H., and Bernstein, H. J. *Can. J. Chem.* 1978, 56, 2121–2126.
